# Supplementary material for: Gibberellic Acid and Jasmonic Acid Improve Salt Tolerance in Summer Squash by Modulating Some Physiological Parameters Symptomatic for Oxidative Stress and Mineral Nutrition
Source: MDPI journal article supplement (doi:10.3390/plants10122768), 2021-12-15

**Figure S1.** Effect of different salinity levels on seed germination and seedling growth of summer squash seedlings grown for 10 days under salt stress. All values are the mean of three replicates  $\pm$  SE. Values carrying different letters are significantly different at  $p < 0.05$

- (A) Germination percentage
- (B) Plumule and radical length
- (C) Fresh and dry weight

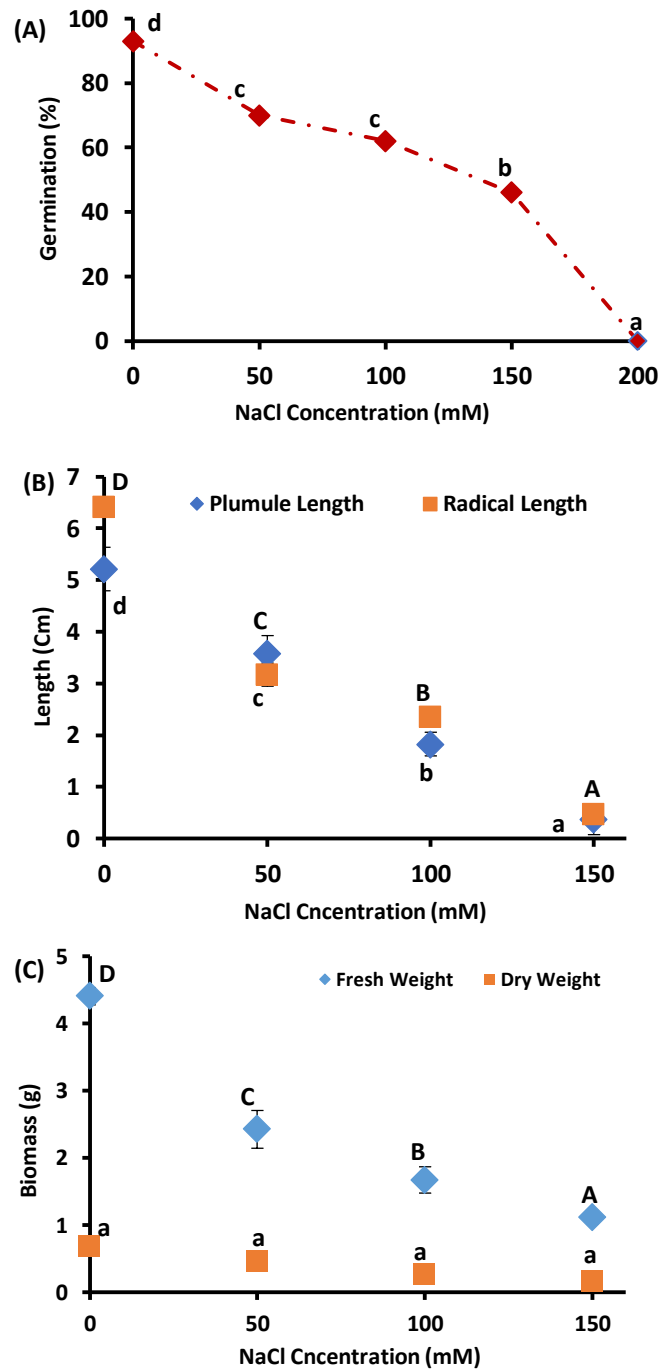

**Figure S2.** Effect of different gibberellic acid concentrations on seedling growth of summer squash seedlings grown for 10 days under salt stress. All values are the mean of three replicates  $\pm$  SE. Values carrying different letters are significantly different at  $p < 0.05$

(A) Plumule length

(B) Radical length

(C) Fresh weight

(D) Dry weight

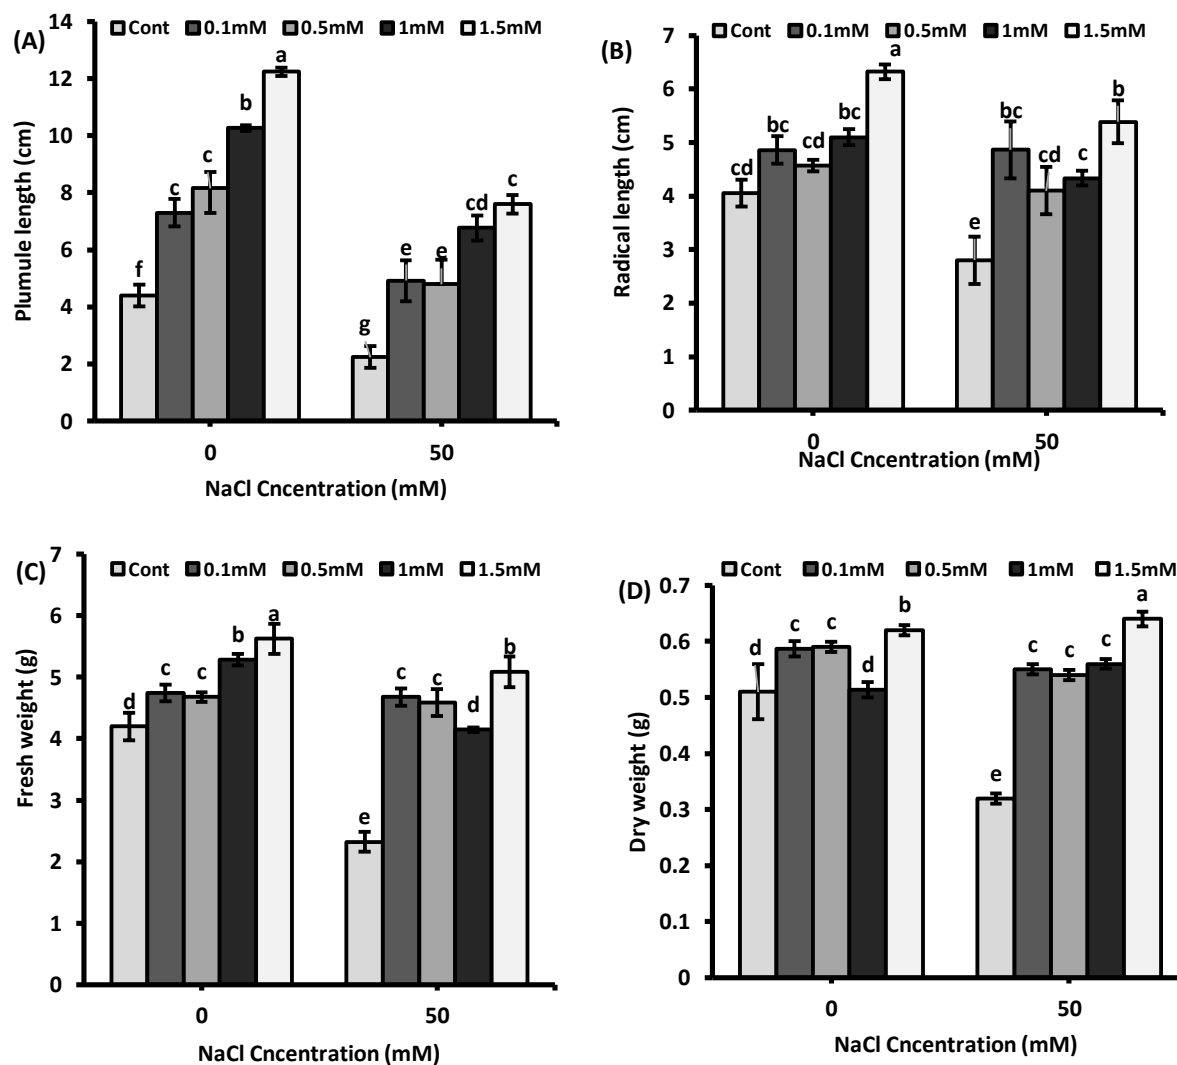

**Figure S3.** Effect of different jasmonic acid concentrations on seedling growth of summer squash seedlings grown for 10 days under salt stress. All values are the mean of three replicates  $\pm$  SE. Values carrying different letters are significantly different at  $p < 0.05$

- (A) Plumule length
- (B) Radical length
- (C) Fresh weight
- (D) Dry weight

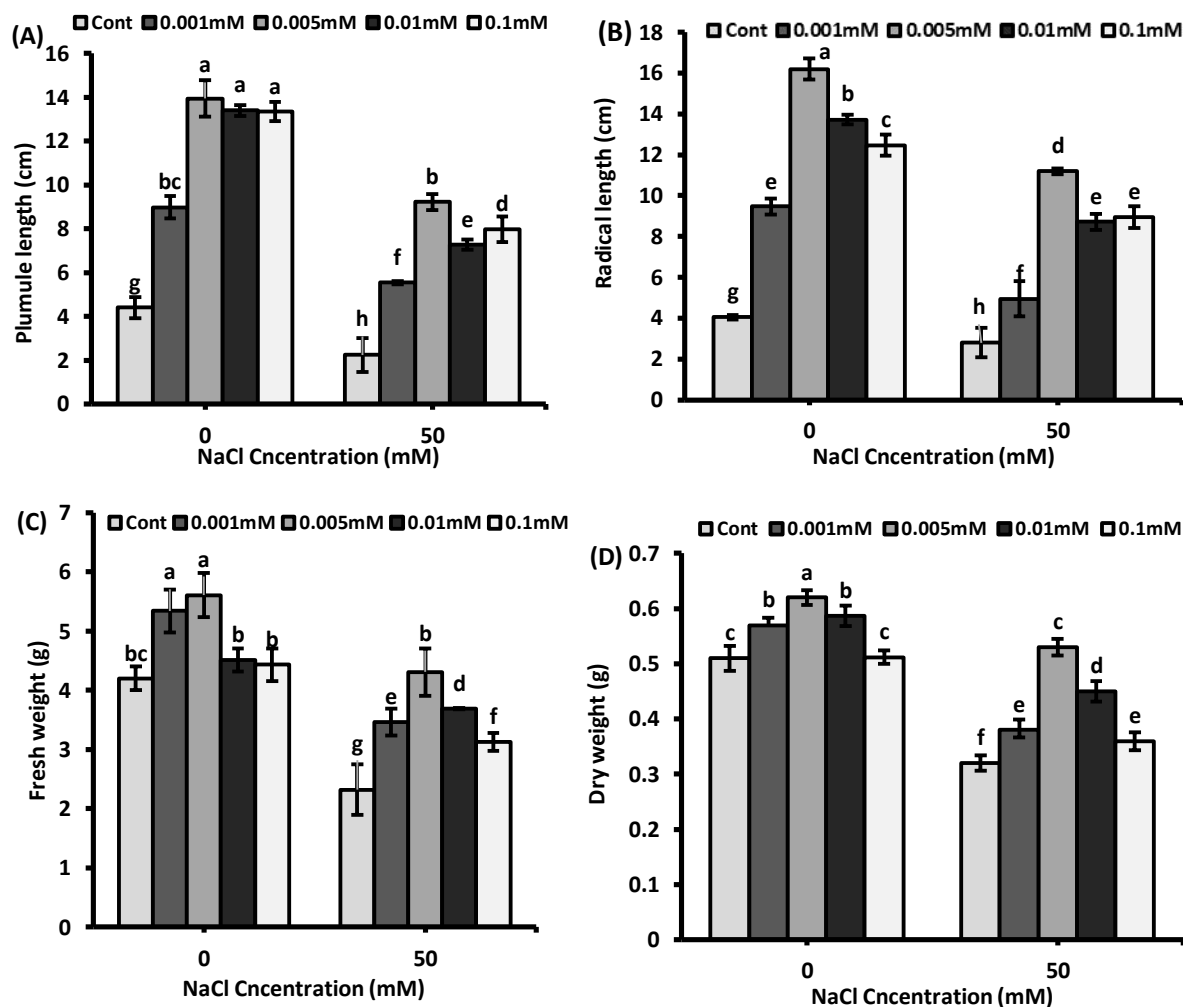

Supplement: s1 [file s1]
